# Supplementary material
Source: PubMed Central journal article supplement (PMC6009759)
Supplement: mmc1.pdf [file mmc1.pdf]

**Supplementary Table:** Media compositions settled on by June 1976.

Earles 10xBSS , no bicarb lot 364046 Fresh BDH water

0.11g% Pyruvate

0.21g% bicarb

100iu/ml Pen                    281 mOsm/Kg

Earles Hep 10x as above

10iu/ml Heparin

0.11g% Pyruvate

0.21g% bicarb                    279 mOsm/Kg

Earles albumin for granulosa cells 10x as above

0.11g% Pyruvate

0.21g% bicarb

0.36g BSA/100 ml                282 mOsm/Kg

F10 Lot 135076

0.21g% bicarb

CaCl<sub>2</sub>·2H<sub>2</sub>O 8.82 mg%

MgCl<sub>2</sub>·6H<sub>2</sub>O 6.344 mg%

0.5mg% L-glut                    280.5 mOsm/Kg

F10 Transf – as above, minus bicarb

285 mOsm/Kg

15 Jun:                    F10 same lot, no extra Ca/Mg, 0.21 bicarb 282-283

F10 transf fresh                280 mOsm/Kg
